# 1 Learning cell communication from spatial graphs of cells

2 David S. Fischer<sup>1,2,\*</sup>, Anna C. Schaar<sup>1,3,\*</sup>, Fabian J. Theis<sup>1,2,3,+</sup>

3 <sup>1</sup>Institute of Computational Biology, Helmholtz Zentrum München, 85764 Neuherberg, Germany

4 <sup>2</sup>TUM School of Life Sciences Weihenstephan, Technical University of Munich, 85354 Freising, Germany

5 <sup>3</sup>Department of Mathematics, Technical University of Munich, 85748 Garching bei München, Germany

6 + correspondence to [fabian.theis@helmholtz-muenchen.de](mailto:fabian.theis@helmholtz-muenchen.de)

7 \* These authors contributed equally

8

9 Tissue niches are sources of cellular variation and key to understanding both single-cell and tissue  
10 phenotypes. The interaction of a cell with its niche can be described through cell communication events.  
11 These events cannot be directly observed in molecular profiling assays of single cells and have to be  
12 inferred. However, computational models of cell communication and variance attribution defined on data  
13 from dissociated tissues suffer from multiple limitations with respect to their ability to define and to  
14 identify communication events. We address these limitations using spatial molecular profiling data with  
15 node-centric expression modeling (NCEM), a computational method based on graph neural networks  
16 which reconciles variance attribution and communication modeling in a single model of tissue niches.  
17 We use these models in varying complexity across spatial assays, such as immunohistochemistry and  
18 MERFISH, and biological systems to demonstrate that the statistical cell–cell dependencies discovered  
19 by NCEM are plausible signatures of known molecular processes underlying cell communication. We  
20 identify principles of tissue organisation as cell communication events across multiple datasets using  
21 interpretation mechanisms. In the primary motor cortex, we found gene expression variation that is due  
22 to niche composition variation across cortical depth. Using the same approach, we also identified  
23 niche-dependent cell state variation in CD8 T cells from inflamed colon and colorectal cancer. Finally,  
24 we show that NCEMs can be extended to mixed models of explicit cell communication events and latent  
25 intrinsic sources of variation in conditional variational autoencoders to yield holistic models of cellular  
26 variation in spatial molecular profiling data. Altogether, this graphical model of cellular niches is a step  
27 towards understanding emergent tissue phenotypes.

28

29 Cells interact on multiple length-scales through direct contact of surface-bound receptors and ligands,  
30 tight-junctions and mechanical effects, as well through indirect mechanisms, including soluble factors and  
31 vesicles<sup>1</sup>. These communication events can usually not be directly observed but are critical to understand  
32 emergent phenomena in tissue niches. However, the sender and receiver cell of a communication event are often  
33 characterized by molecular signatures, both facilitating the signalling, such as ligand and receptor expression<sup>2-4</sup>,  
34 and resulting from the signalling event, such as intracellular cascades induced by receptor activation. These  
35 molecular signatures are used in computational methods to infer latent cell communication events in a tissue.  
36 Core assumptions inherent in these algorithms can be summarized in two groups: First, the co-occurrence of  
37 ligand and receptor expression across cell-types is used in multiple computational models to suggest putative  
38 axes of cell communication<sup>2,3</sup>. Second, from a statistical point of view, cell communication is a source of cellular  
39 variance. The gene expression of a receiving cell depends on the sending cells in the local tissue niche, thus  
40 inducing a statistical dependency that can be used to infer communication events<sup>2,5</sup>. Here, we address three core  
41 issues inherent in cell communication inference methods founded on these two assumptions using spatial  
42 information. First, axes of cell communication cannot be necessarily disentangled based on data from dissociated  
43 cells because of the large number of potential interactions in a population of cells. We propose to use spatial  
44 information from image-structured molecular profiling assays to constrain the inference of such gene expression  
45 dependencies between neighboring cells. For this purpose, we define a prior distribution on the possibility of a  
46 communication event between two cells as a function of their distance, using space to prioritize pairs of cells for  
47 which communication is molecularly plausible. Second, cell pairs with matching ligand and receptor expression  
48 can occur in a tissue even in the absence of communication, for example because of spatial separation in the  
49 tissue architecture. We propose to use the receiver cell molecular signature as conclusive evidence for the  
50 presence of a communication event. Third, molecular signatures of receiver cells can be observed independent  
51 of ligand–receptor quantification. Therefore, cell communication inference should be possible both in the absence  
52 of a reliable quantification of ligand or receptor genes, which occurs in targeted molecular profiling assays, or in  
53 cases in which these genes are expressed at low levels, and in receptor protein-free communication, such as in  
54 physical interactions. We define a generalized framework to detect receiver cell signatures detached from  
55 ligand–receptor definitions.

56

57 We reconcile these assumptions in a statistical model for cell communication events in spatial molecular profiling  
58 data, referred to as a node-centric expression model (NCEM). NCEMs are trained on segmented  
59 image-structured molecular data from assays with subcellular resolution, such as immunohistochemistry<sup>6,7</sup>,  
60 imaging mass cytometry<sup>8</sup>, and MERFISH<sup>9</sup> (Fig. 1a). We enforced a neighborhood constraint on communication  
61 events using spatial graphs of cells, where the graph serves as prior for cellular communication. The resulting  
62 model is a graph neural network<sup>10,11</sup> and constitutes an extension of models of dissociation-based data, in which  
63 cells are modeled independently, to a spatially-constrained model of cell–cell dependencies (Fig. 1a). This model  
64 relies on the stratification of cells into clusters that can then be treated as categorical sender and receiver  
65 cell-types in communication events. Importantly, the directionality of these sender–receiver signalling is defined  
66 on the level of pairs of single cells by the statistical association of the molecular state of the receiver on the  
67 sender. We discovered these statistical associations in a model of the molecular state of cells conditioned on the  
68 putative sender cell-types present in their respective spatial neighborhoods. The complexity of the spatial  
69 dependencies observed in a tissue strongly depends on the tissue architecture and the ability of the molecular  
70 readout to capture the signatures of these dependencies. Therefore, the cell communication model  
71 complexity needs to be adapted to the scenario at hand. We studied three increasingly complex models of  
72 cell–cell dependencies. First, we propose a linear graph neural network that can be framed as a graph-aware  
73 generalized linear model (GLM) to model linear expression effects of cell communication. Secondly, we  
74 generalize NCEMs to nonlinear graph neural networks that can account for higher-order cell interactions. Third,  
75 we consider generative latent variable models that also model confounding latent sources of variation, such as  
76 cell intrinsic effects. We interpret NCEM fits in terms of cell communication patterns. We demonstrate cell  
77 communication inference with NCEMs on five datasets (Online methods, Supp. Figure 2): a MERFISH dataset of  
78 mouse brain<sup>12</sup> (MERFISH – brain) of 634 images across with 254 genes observed in 284,098 cells, a chip  
79 cytometry dataset of an inflamed colon (Data Availability) (chip cytometry – colon) of two images with 19 genes  
80 observed in 11,321 cells, a MIBI TOF dataset of colorectal carcinoma<sup>8</sup> (MIBI TOF – cancer) of 58 images with 36  
81 genes observed in 63,747 cells, a MELC dataset of tonsils<sup>7</sup> (MELC – tonsils) of one image with 51 genes  
82 observed in 6,991 cells and a CODEX dataset of colorectal cancer<sup>13</sup> (CODEX – cancer) of 140 images with 57  
83 genes observed in 272,266 cells. We discover cell–cell dependencies at molecularly plausible length scales and  
84 attribute molecular variation within cell-types to niche composition. The inferred interactions between cells serve  
85 as a powerful mechanism to interpret niche composition variation and its effect on the contained cell.

## 86 Results

### 87 Node-centric expression models describe cell–cell dependencies on spatial graphs

88 We infer cell communication from a cell-type-specific gene expression signature that can be predicted from  
89 cell-types in the spatial neighborhood. The data type discussed here consists of image-structured data from  
90 molecular profiling assays of RNA or proteins, where pixels correspond to tissue slice positions. Each channel  
91 contains a molecular abundance readout of a specific gene. To prepare this analysis, we first used segmentation  
92 masks to assign pixels in image-structured data to cells (Fig. 1a,c). We then extracted the mean gene expression  
93 from these segments to build cell-wise gene expression vectors and clustered these molecular vectors to assign  
94 cells to discrete cell-types (Fig. 1a,c). Based on the cell segmentation, we defined the niche of a cell as the set of  
95 cells within a circle centred on the cell's center. The radius of this circle, the “resolution”, is a model  
96 hyperparameter (Online Methods, Fig. 1a). We define a node-centric expression model (NCEM) as a function  
97 that maps a cell's type and its spatial context to the cell's observed gene expression vector (Fig. 1b). This  
98 function is a graph neural network in which the node labels are the cell-wise gene expression vectors<sup>10</sup>. Below,  
99 we discuss both multilayer graph neural networks and a single-layer model with an indicator graph aggregator  
100 function which is equivalent to a linear model (Fig. 1b, Online Methods): The indicator function aggregator  
101 summarises a set of one-hot encoded cell-types in a niche to a vector with binary elements that indicate the  
102 presence of each cell-type in the niche. This binary embedding is parameter-free and a transformed covariate  
103 space with fixed dimensions and thus suitable for a linear model. In addition to this indicator embedding, we also  
104 use parametric neighborhood-embeddings for nonlinear NCEMs (Online Methods). The model of a gene  
105 expression vector conditioned on a cell-type reflects the assumption that niches modify gene expression states of  
106 cell-types, but do not cause cell-type conversions themselves. This conditional model also reflects the  
107 assumption that much spatial information is contained in the gene expression profile of a single cell<sup>14</sup> and that  
108 spatial covariates are primarily useful to supervise variance decomposition of gene expression vectors. In  
109 summary, the input data to NCEMs consists of three groups: the set of input cell-type labels, the output gene  
110 expression features and the spatial proximity graph.

112 The input cell-type labels group cells to both sender and receiver cell-types, this annotation can be more or less  
113 coarse according to the cell-type clustering resolution. Cell-types from one sender class emit a common signal,  
114 and cell-types of one receiver class share a common response gene expression signature for a given signal. The  
115 coarseness of the sender and receiver cell-type classes serves as an inductive prior which regularizes the model  
116 by reducing the number of parameters that model cell communication. For example, an overly fine-grained set of  
117 receiver cell-types could attribute niche-dependent cellular variation within a cell-type to between-cluster  
118 variation, thus failing to attribute this axis of variation to niche composition.

119

120 The identity and number of molecular species measured in a spatial molecular profiling assay vary strongly  
121 across protocols and studies. Accordingly, the observable neighborhood-induced gene expression effects vary  
122 equally strong. One could include further cell-features related to morphology and molecule distribution in the cell  
123 state<sup>15</sup> to improve the description of the molecular state of a cell to subcellular gene expression variation.

124

125 In a spatial proximity graph, cells are connected by edges if their segment centers are not further apart than the  
126 resolution of the model<sup>16</sup> (Fig. 1a). The choice of this resolution depends on the modeled molecular mechanisms  
127 of communication, which vary strongly between contact-based and paracrine communication, for example. In this  
128 study, we chose multiple resolutions for each dataset in separate analyses. Each resolution is associated with a  
129 separate graph that has a specific node degree distribution which depends on the overall tissue architecture. We  
130 defined the distances for each dataset such that they cover the range of average node degrees of the given  
131 dataset (Supp. Fig. 1b). This screening of resolutions is useful for discovery of statistical dependencies. On the  
132 other hand, a fixed, single resolution can be used to test specific hypotheses of cell communication events on a  
133 length scale defined by prior knowledge based on molecular mechanisms.

#### 134 **Linear NCEM identify cell communication on consistent spatial length scales**

135 We model neighborhood-induced cell state changes with a linear graph neural network that predicts the state of a  
136 receiver cell conditioned on the presence of putative sender cell-types present in its neighborhood. This model is  
137 equivalent in architecture to a graph-aware GLM (Online Methods) and, therefore, represents a convex  
138 optimization problem. While limited in their ability to model higher-order cell interactions, such linear models can  
139 be readily interpreted in terms of effect sizes, can be used by non-specialists because of their favourable  
140 optimization characteristics and allow for correction for confounding factors such as biological conditions.

141

142 First, we established the presence of intra-cell-type variance in a variance decomposition on all five datasets  
143 (average intra-cell-type variance 40.6%), even in those datasets with very few genes assayed (Supp. Fig. 2,  
144 Online Methods). We fit Gaussian GLMs on transformed single-cell expression measurements across multiple  
145 neighborhood sizes with four term groups: image covariates, the cell-type, the presence of putative sender  
146 cell-types in the neighborhood (the niche), and an interaction term between the cell-type and the niche (Online  
147 Methods). As a null model, we included empty neighborhoods and neighborhoods larger than the considered  
148 images. We found that these GLMs were most predictive on an intermediate-length scale of around 69  $\mu\text{m}$  in all  
149 five datasets (Fig. 1d), showing that cell-cell dependencies indeed only appear on length scales characteristic of  
150 direct and short-range molecular mechanisms of cell communication. With further increasing neighborhood sizes,  
151 the prediction performance drops again to the level of nonspatial models, indicating that the spatial effect is not  
152 simply due to overfitting to images. The NCEMs outperformed non-spatial baseline models by an average  $\Delta R^2$   
153 of 0.0175. This difference was significant in paired t-test between baseline model and best spatial model of ( $p <$   
154 0.05) across five datasets (Fig. 1d). The  $\Delta R^2$  is small compared to the baseline model  $R^2$  that characterizes  
155 between-cell-type variance (0.39 - 0.79) because the cell-type information accounts for a large fraction of the  
156 transcriptomic variance in these samples. Between-cell-type variance often dominates variance in single-cell  
157 transcriptomics which is a phenomenon that allows for cell-type assignment through clustering algorithms, for  
158 example<sup>17-19</sup>. The remaining within-cell-type variance decomposes into technical noise and within-cell-type  
159 biological variance. The biological within-cell-type variance can be decomposed into spatial and non-spatial  
160 effects. Here, we only model the spatial component, thus explaining the low magnitude of explained  
161 within-cell-type variance compared to the total within-cell-type variance. The increased  $R^2$  achieved by NCEM  
162 can be attributed to the niche composition information inherent in the model, thus providing an algorithmic handle  
163 on niche biology.

164

165 In addition, we also fit GLMs with fewer parameters, without cell-type to niche interaction terms, keeping only  
166 non-receiver-specific sender effects, which are less susceptible to overfitting, and also found dependencies on

167 similar length scales (Supp. Fig. 3, Online Methods). We hypothesized that different molecular mediators of  
168 cell–cell dependency on different length-scales apply to different cell-types. Indeed, the model performance as a  
169 function of length scale by target cell-type varies between cell-types (Supp. Fig. 4).  
170

#### Niche composition explains cellular variation

171 Next, we interpreted the effects learned by the linear NCEMs. To identify neighborhood-induced molecular states  
172 in the primary motor cortex, we selected L2/3 IT cells from the MERFISH – brain dataset<sup>12</sup> based on their strong  
173 spatial effects on cell state (Supp. Fig. 4) and their large abundance, with 41,996 cells across the dataset (Supp.  
174 Fig. 1a). To identify neighborhood-induced effects on the molecular states without confounding the analysis by  
175 between-image batch and condition effects, we clustered and embedded L2/3 IT cells from a single image based  
176 on the molecular information alone (Fig. 2a, Online methods). Indeed, the relative prediction performance of the  
177 graph-aware GLM at the optimal resolution compared to nonspatial GLM varies across these clusters (Fig. 2b),  
178 as measured by the difference of their respective  $R^2$  on individual cells. Using the presence of different cell-types  
179 in the neighborhood as a binary labels vector, we performed a cluster enrichment analysis with Fisher's exact test  
180 on this clustering (Fig. 2c,d, Online Methods) to annotate clusters with enriched neighborhoods: sub cluster 0 is  
181 associated with Scng and VLNC, and cluster 4 with L4/5 IT cells, for example (Fig. 2d). We ordered cell-types as  
182 putative sender types of L2/3 IT cells by their maximal cluster-wise enrichment p-value. This ordering of  
183 cell-types is very different from the ordering obtained from contact frequencies and CellphoneDB<sup>3</sup> analysis on this  
184 image (Kendall rank correlation of -0.04 and -0.12, p-value of 0.79 and 0.45, respectively, Supp. Fig. 6a, 7b,  
185 Online methods), highlighting the novel quality of information captured by this approach. Depending on the  
186 analysis setting, either L4/5 IT cells and Scng or L4/5 IT cells and VLNC are also discovered as putative partners  
187 of L2/3 IT cells by CellphoneDB (Supp. Fig. 7a,b), showing that core associations are reproduced. Next, we  
188 established that the L2/3 IT cell sub clusters are spatially localised in distinct areas of the primary motor cortex<sup>12</sup>.  
189 Sub cluster 0 is closer to the layer of Scng and VLNC, whereas sub cluster 4 is closer to the layer of L4/5 IT cells  
190 (Fig. 2c,d). This spatial patterning becomes apparent when the sub-cluster-wise relative performance spatial and  
191 non-spatial model (Fig. 2b) are broken down to cell-wise comparisons and assigned to cells in their spatial  
192 context: The spatial model outperforms the non-spatial model strongly on margins of the L2/3 IT layer in the  
193 motor cortex, such as in sub cluster 4 of the L2/3 IT cells (Fig. 2e). We repeated this analysis by applying the  
194 same models, which were trained on all images, to a second image and found similar associations to  
195 neighborhoods, such as significant associations to Scng, VLNC, and L4/5 IT cells (Supp. Fig. 5b-f). In summary,  
196 this analysis attributes molecular variation of single cells to their niche and identifies putative sender cell-types  
197 which are in line with the overall tissue architecture.  
198

199 In an equivalent analysis on the chip cytometry – colon data, we discovered a dependency of CD8 T cells on  
200 multiple other cell-types, such as CD8 T cells and lamina propria cells (sub cluster 3) (Supp. Fig. 8a-e),  
201 highlighting a dense compartment of T cells in the inflamed colon centred on lamina propria cells (Supp. Fig. 8f).  
202 In colorectal cancer, linear NCEM learned a previously established dependency of CD8 T cell states on proximity  
203 to the tumor–immune boundary<sup>8</sup> (Supp. Fig. 9a-e), where sub cluster 1 represents cells close to malignant  
204 epithelial cells (Supp. Fig. 9c,f).  
205

206 Next, we considered parameter significance in GLMs as a mechanism to attribute cellular variation to  
207 communication events with specific sender cell-types. We used a differential expression test, a Wald test, to test  
208 gene-wise cell communication coefficients in the linear model. In the linear model as defined above, the Wald test  
209 yields a p-value for the effect of the interaction between each pair of cell-types on each assayed gene in the  
210 receiver cell-type. The inference of cell communication with this gene-centric model improves with the number of  
211 assayed genes, as only a subset of all genes will display differential expression in response to the  
212 communication event. We found receiver cell-type-gene pairs that significantly depend on the neighborhood in  
213 the chip cytometry – colon data (Supp. Fig. 10c): Here, one would expect communication events with immune  
214 cells because of the inflamed state of the colon. The communication between sender PD1L+ cells and receiver  
215 CD8+ T cells was the strongest in terms of the number of differentially expressed genes, suggesting that  
216 PD1-mediated T cell exhaustion<sup>20</sup> plays a role in this tissue. Importantly, this communication is not identifiable  
217 from cell contact frequencies (Supp. Fig. 6b) or CellphoneDB analysis (Fig. 7c), as expected for a  
218 sender–receiver-specific signature that occurs in a particular tissue niche. Indeed, we found PD1 in the set of  
219 genes whose expression is significantly associated with this receiver-sender pair ( $p=0.02$  for an absolute change  
220 in log-transformed data of -1.92, Supp. Fig. 10).

## 221 **Nonlinear NCEM capture complex cell communication motifs**

222 Linear models for cell communication cannot easily account for higher order interactions between more than two  
223 cell-types. Such complex interactions are, however, models of relevant patterns of communication in niches: The  
224 communication between two cells A and B may depend on a communication event between B and a cell C which  
225 induces ligand expression in B. Moreover, edge properties, such as weights derived from physical distances  
226 between cells, or molecular characteristics of communication axes, are difficult to account for in linear models.  
227 Here, we discuss multilayer NCEMs which can model both higher order cell communication and edge properties.  
228 These graph neural networks can be understood as encoder–decoder models. The encoder is a function of the  
229 local context in the graph and yields a latent state that is transformed by a stack of densely-connected layers in  
230 the decoder to the predicted expression state of the cell (Fig. 3a). In contrast to autoencoding encoder–decoder  
231 models often used to model heterogeneity in single cells from dissociated tissues<sup>21,22</sup>, this encoder–decoder  
232 NCEM is a nonlinear regression model that does not receive the expression state in the input (Online Methods).

233

234 First, we established the presence of resolution-dependent prediction performance profiles in encoder–decoder  
235 NCEMs in both models with indicator aggregators and graph-convolutional filters, again controlled by empty and  
236 large neighborhoods (Fig. 3b). The top-performing length scales were comparable to those obtained on linear  
237 models (Fig. 3b). We could identify cell-type-specific communication length scales again (Supp. Fig. 11). Notably,  
238 the encoder–decoder models did not outperform linear models on any dataset in terms of reconstruction metrics  
239 on test data, which suggests that niche communication is described well by additive pairwise communication  
240 events of cells in these tissues at the given sample complexity, rather than higher-order interactions.

241

242 As any neural network, encoder–decoder NCEMs can be interpreted in terms of cell communication events  
243 through gradient analysis. The gradients of output expression values with respect to input receiver cell-type and  
244 input sender cell-types approximate the effect that a change in neighborhood composition of a given cell would  
245 have on its molecular state (Online Methods). Using this interpretation method, we identified L4/5 IT as a putative  
246 sender cell-type for L2/3 IT cells in the MERFISH – brain dataset<sup>12</sup> (Fig. 3c), which agrees with the strong  
247 association between these two cell-types identified in the cluster enrichment (Fig. 2c). Using a similar approach,  
248 we identified lamina propria cells as predictors of CD8 T cell state in the chip cytometry – colon dataset (Fig. 3d),  
249 reproducing this same association identified with linear NCEM (Supp. Fig. 8c,e).

## 250 **NCEMs extended to latent cell-intrinsic states explain more variance**

251 Above, we discussed NCEMs as mechanistic models designed to attribute intra-cell-type variance to predictors in  
252 the niche. These NCEMs cannot model latent cell states that confound the measured expression data,  
253 representing important intrinsic cellular phenomena, such as cell cycle states or differentiation progression. A  
254 holistic model of cellular variance needs to account both for these intrinsic and extrinsic effects to disentangle  
255 confounded sources of variation<sup>5</sup>. Therefore, we propose an NCEM that accounts for both cell intrinsic latent  
256 states and the dependencies of molecular states on the niche. The proposed model is a conditional variational  
257 autoencoder (CVAE) in which the condition represents the neighborhood and the cell-type of the cell itself (Fig.  
258 4a). In contrast to the node-supervised models discussed above, this CVAE is a node-generative model. This  
259 node-generation tasks of learning a distribution over gene expression states conditioned on the cell-type, a local  
260 context in the graph, and other covariates, such as chemical perturbation, extends generative models for  
261 single-cell gene expression data<sup>21,23</sup> to spatial cell–cell dependencies.

262

263 Conditional generative models have previously been used to model perturbations of molecular states by small  
264 molecules<sup>23</sup> in the context of data from dissociated tissues. Latent variable models attain much higher predictive  
265 performance in reconstruction tasks (Fig. 4b, Supp. Fig. 13a) because they can fit cell-wise states if the model  
266 does not suffer from posterior collapse<sup>24</sup>. However, conditional variational models suffer from a non-identifiability  
267 between the variation attributed to the condition and to the latent states because the loss function only constrains  
268 the model's marginal likelihood. A CVAE that is ideally suited for style transfer is converged such that the  
269 condition-wise marginal posteriors on the latent variables are equal, so that one can sample the full conditional  
270 distribution by decoding the latent states observed in a source condition into the target condition. However, there  
271 are optima of equal loss values in which the condition information bleeds into the latent variables, resulting in  
272 condition-specific latent states that cannot meaningfully be transferred to a target condition. We attempted to  
273 address this non-identifiability with aggressive encoder training, an optimization approach capable of favoring  
274 convergence to a model that attributes maximal variation in the marginal distribution to the conditional<sup>25</sup> (Online  
275 Methods). We evaluated the ability of a CVAE–NCEM to extrapolate to unseen neighborhoods, a style-transfer  
276 setting we call “neighborhood transfer” (Online Methods) using the example of muscular and Lamina Propria cells

277 from the chip cytometry – colon data (Fig. 4c) and L2/3 IT neurons from the MERFISH – brain dataset<sup>12</sup> (Supp.  
278 Fig. 13b). We did not find consistent neighborhood-transfer performance differences between CVAE-NCCEM  
279 compared and plain CVAEs, even though peak performance was attained by CVAE-NCCEM optimized with  
280 aggressive encoder training (Online Methods). This performance analysis suggests that niche states are  
281 represented in latent variables, thus confounding resampling in the neighborhood transfer task. Indeed, we could  
282 identify multiple significantly enriched neighborhoods in a latent space clustering of the CVAE-NCCEM for both  
283 examples (Fig. 4d-f, Supp. Fig. 13c-e). This latent variable interpretation shows that the CVAE indeed converges  
284 to an optimum that is not desirable in terms of the style transfer task, which can occur because these optimums  
285 are not penalized by the CVAE's cost function.

286

287 NCCEMs can attribute molecular variation of single-cells to niche composition and thus carry the promise of  
288 explaining variance previously not interpretable in dissociation data. Still, even with niche variance attributed,  
289 further sources of cellular heterogeneity are latent in spatial assays (Fig. 4b). CVAE-NCCEMs are a model class  
290 that can close this gap between niche variation and latent variables. Further algorithmic work and targeted data  
291 acquisition are required to resolve the non-identifiability encountered in the examples discussed here.

## 292 Discussion

293 We presented NCCEMs, a graph neural network framework for modeling of cell communication events in spatial  
294 omics assays with subcellular resolution, in which cells can be separated *in silico* through segmentation. The  
295 NCCEMs presented in this paper are structured in three groups: a linear graph neural network that can be mapped  
296 to a GLM, nonlinear graph neural network and CVAEs. We defined the extrapolation to unseen neighborhoods,  
297 the prediction of the molecular state of a cell of a given type in a given niche, as a supervision task and proposed  
298 an adaptation of this task to generative style transfer models (“neighborhood transfer”). We used NCCEMs to  
299 discover statistical dependencies between cells on physiologically relevant length scales at a mean of 69  $\mu\text{m}$  with  
300 a standard error of 14  $\mu\text{m}$  across five datasets. We demonstrated that NCCEMs could be interpreted based on  
301 model parameters in linear models and saliencies in nonlinear models to infer communication events between  
302 pairs of cell-types and to disentangle molecular variation in standard cell-centric unsupervised workflows. Using  
303 these interpretation mechanisms, we disentangled niche effects in the mouse motor cortex, in the inflamed colon  
304 and in colorectal cancer.

305

306 The datasets discussed here are based on technologies with high throughput in the number of cells but relatively  
307 few genes measured. For example, imaging-mass cytometry<sup>26</sup> and CODEX<sup>6</sup> both profile on the order of tens of  
308 genes. Typically, these genes are selected to separate cells from different cell-types, maximizing between-type  
309 variance in the data. However, these setups are not designed to profile within-type variance. The more subtle cell  
310 states within a cell-type are typically recovered in protocols with large feature spaces, such as spatial single-cell  
311 RNA-seq, but also FISH-based protocols, such as seq-FISH<sup>27</sup> and MERFISH<sup>9</sup>. Although gene expression-based  
312 inference of cell communication will probably be improved by techniques that yield larger feature spaces, we  
313 could already show in this study that spatial dependencies can be estimated across cross-validation splits of the  
314 larger MERFISH dataset with 254 genes measured. We anticipate that such high-dimensional RNA-seq  
315 characterizations of single cells in tissues will soon be widely available because of the improvements of seq-FISH  
316 and MERFISH protocols and the reduction of spot sizes in spot-based transcriptomics. Datasets with more  
317 comprehensive quantification of ligand and receptor expression per cell may allow for further constraints on  
318 edges based on the expression of specific ligand and receptor pairs in the participating nodes. Such constraints  
319 may further increase interpretability and improve discovery of cell communication events through linear model  
320 interpretation and saliency-based analyses. Such constraints may further be derived through imputation of  
321 relevant ligand and receptor genes in spatial assays using reference single-cell atlases<sup>14</sup>. All models proposed  
322 here are node-centric and embed a cell locally in the graph, instead of requiring the full graph. Therefore, NCCEMs  
323 can be used equally well and efficiently on a few large images or on many small images, thereby increasing their  
324 relevance for a wider range of scenarios.

325

326 The datasets modeled here are 2D and do not contain information about cells that are also part of a receiver  
327 cell's 3D neighborhood but are located in a different z-section; this limits the capacity of the models shown here  
328 to find communication events. One would expect NCCEMs to be considerably stronger given 3D data, and we  
329 expect such data to become available from serial slicing of tissues, for example.

330

331 Here, we considered graph convolutional networks with linear and indicator graph aggregator functions. Other  
332 aggregators are used commonly to compute graph embeddings<sup>28</sup> and could also be used here. The complexity of

333 the graph neural network used in the NCEM defines the complexity of the motifs of cell communication that can  
334 be discovered. Linear NCEMs discover directional effects between pairs of cells. Higher order effects, that can be  
335 captured by deeper graph neural networks, include interactions between different communication events on a  
336 target cell and conditional dependencies between communication events, such as in loops. NCEMs do not  
337 require complex tissue phenotype labels, which are often unavailable. Effectively, the molecular vectors represent  
338 a label on a mid-range length scale of the graph. One can also imagine extending the tissue representation with  
339 more global phenotype labels through additional supervision tasks. The coarseness of the input feature space is  
340 an important hyperparameter for these graph models. Future work may address the choice of this  
341 hyperparameter algorithmically. However, in many cases, there is strong prior knowledge on the assignment of  
342 cell states to discrete cell-types.

343

344 The cell–cell dependencies modeled based on spatial graphs are examples for observational dependencies that  
345 violate the common assumption of statistical learning, namely, that single cells are independent and identically  
346 distributed. We showed that this assumption could be sacrificed given strong inductive priors, here induced by  
347 the spatial graphs, which constrains the modeled communication events from the set of all pairs of cells in a  
348 sample to the molecularly plausible ones. Future work could consider further inductive priors which are not  
349 necessarily spatial.

350 **Figures**

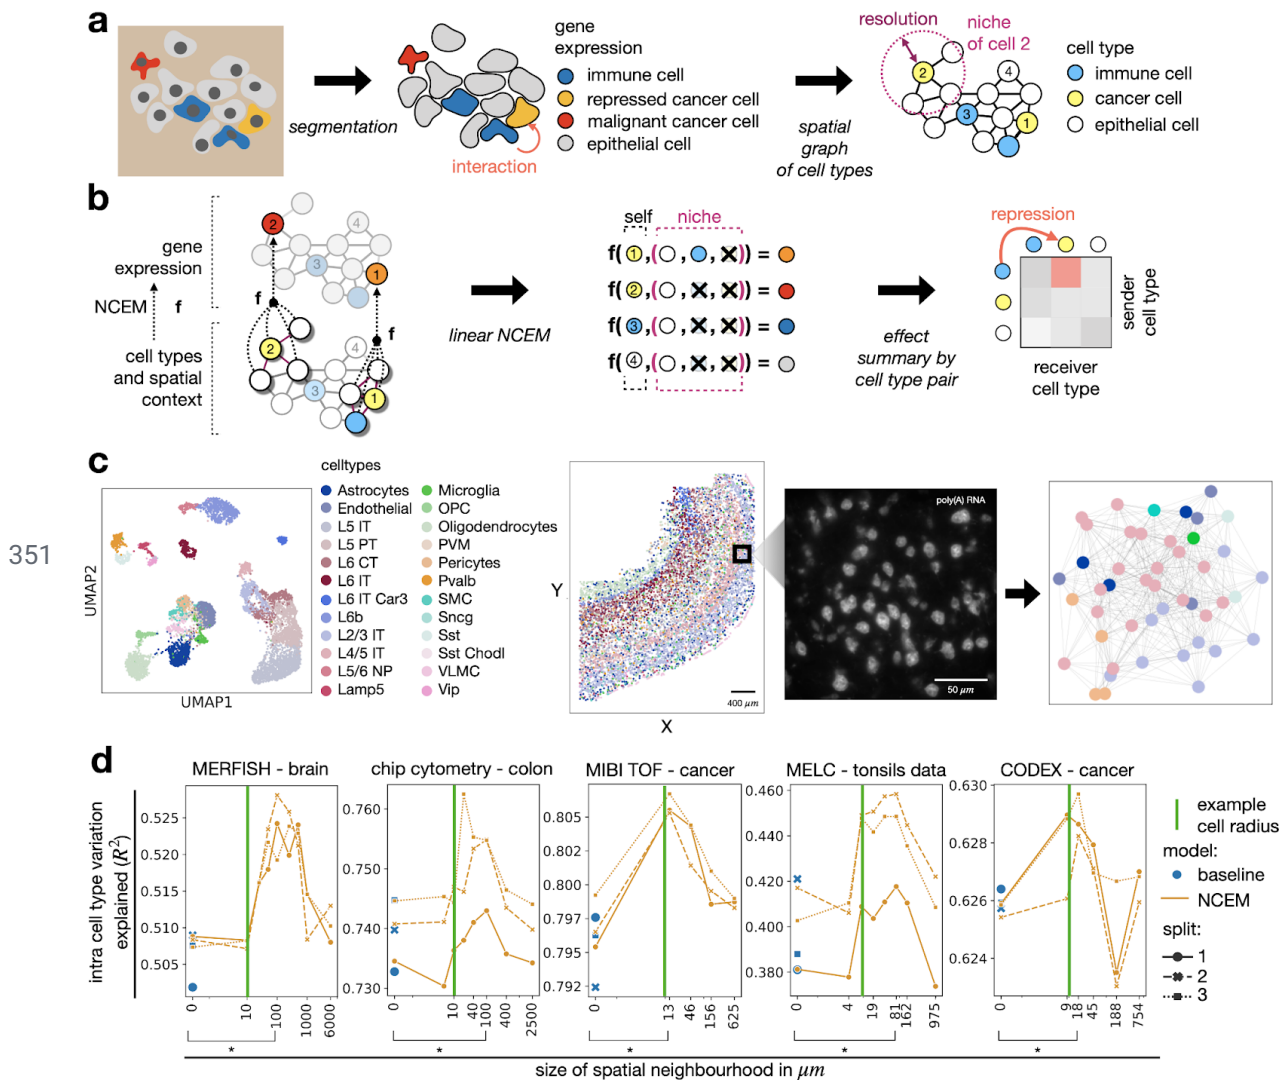

351

352 **Figure 1: Modeling cell communication as spatial cell state dependencies.** (a) Spatial graphs of cells can be  
 353 computed from spatial molecular profiling data. After segmentation of cells or nuclei, each cell is characterized by  
 354 a vector of gene expression measurements which are coarse-grained in a clustering to categorical cell-types. A  
 355 graph can be assembled based on proximity of segments. *resolution*: radius of circle used to define niche. (b)  
 356 Node-centric expression models (NCEMs) describe the gene expression of a cell (color of the node) as a function  
 357 of its spatial neighborhood (niche). This function is a graph neural network and can be reduced to a linear model  
 358 in the simplest case. This linear model contains directional effects from sender to receiver cell-types which can  
 359 be summarised in an effect matrix between cell-types.  $Y$ : gene expression vector of a cell. (c) Proximity graphs in  
 360 spatial transcriptomics data. Shown are a UMAP of molecular embedding of all cells in slide 153 ( $n = 7439$  cells)  
 361 with cell-type superimposed, followed by Slice 153 of mouse brain in the MERFISH – brain dataset with the  
 362 spatial allocation of all cell-types superimposed, field of view number 486 of the same slice with poly(A) RNA  
 363 channel superimposed at central z-plane ( $z = 4.5 \mu\text{m}$ ), and the spatial proximity graph of the same field of view  
 364 with a resolution of  $100 \mu\text{m}$ . (d) Linear models capture neighborhood dependencies in spatially-resolved  
 365 single-cell data. Shown are the  $R^2$  values between predicted expression vectors and observed expression  
 366 vectors for held-out test cells of linear models by resolution in  $\mu\text{m}$  with cross validation indicated as point shape  
 367 and line style with relative outperformance of NCEM model versus baseline model in the MERFISH – brain  
 368 dataset of 1.77%, in the chip cytometry – colon dataset 1.17%, in the MIBI-TOF – cancer dataset 1.04 %, in the  
 369 MELC – tonsils dataset 4.48% and in the CODEX – cancer dataset 0.28%. *Example cell radius (green line)*:  
 370 Example length scale of a cell, here chosen as  $10 \mu\text{m}$ ; *baseline (blue dot)*: a nonspatial linear model of gene  
 371 expression per cell-type; *NCEM*: linear model with interaction effects; *bracket (\*)*: significant difference in paired  
 372 t-test between baseline model and best spatial model (MERFISH – brain dataset  $p = 0.030$ , chip cytometry –



374 colon dataset  $p = 0.019$ , MIBI-TOF – cancer dataset  $p = 0.018$ , MELC – tonsils dataset  $p = 0.029$ , CODEX –  
 375 cancer dataset  $p = 0.026$ ).

376

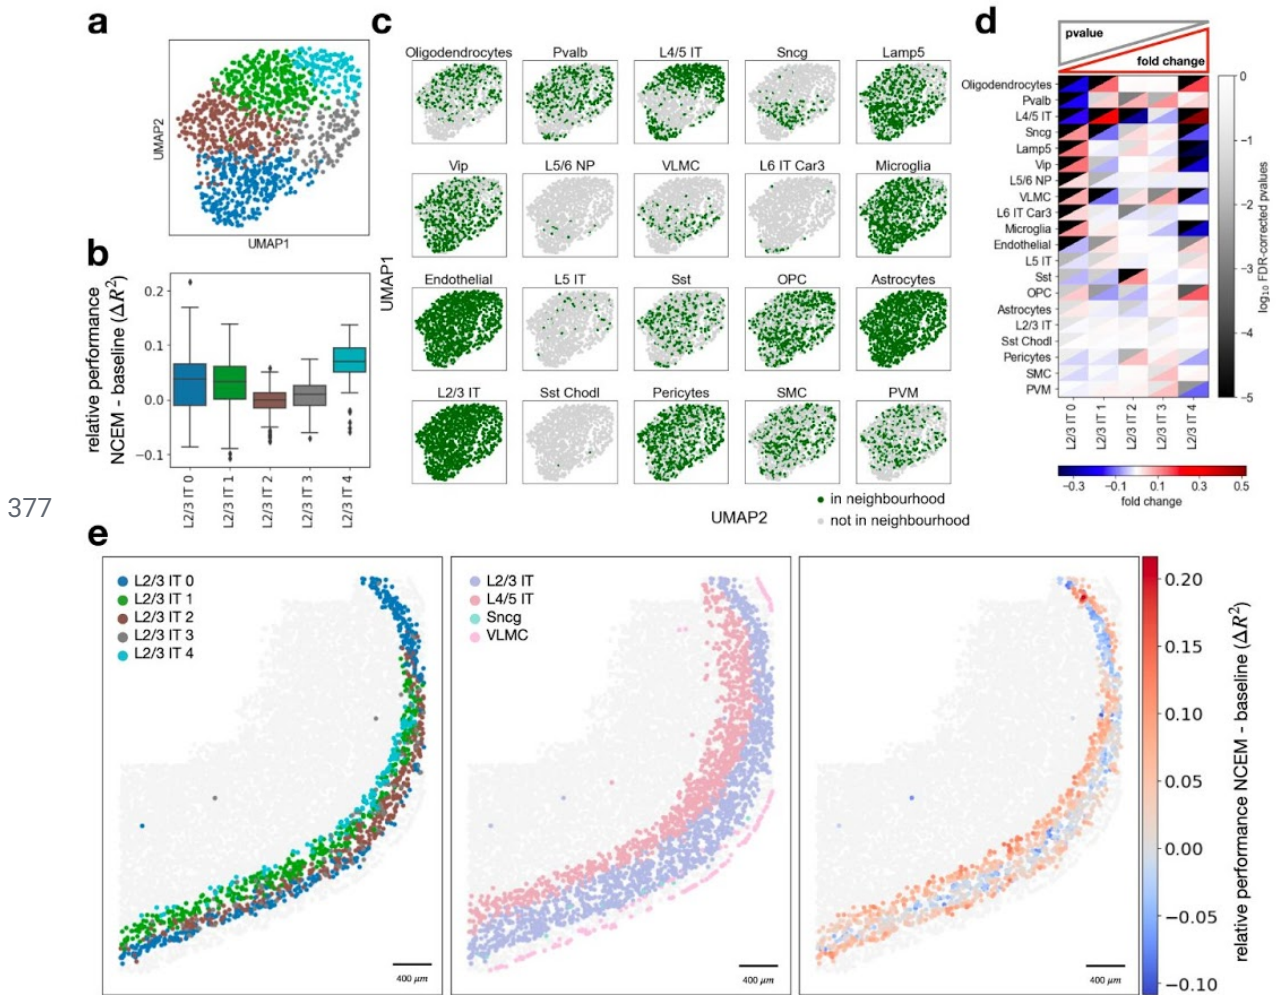

377

378 **Figure 2: Cell heterogeneity can be attributed to niche composition.** (a) UMAPs of molecular embedding of  
 379 L2/3 IT cells with molecular sub-clustering superimposed (colors as in b). (b) Distribution of cell-wise difference of  
 380  $R^2$  between NCEM and non-spatial baseline model by molecular sub-cluster (L2/3 IT 0:  $n = 316$ , L2/3 IT 1:  $n =$   
 381  $314$ , L2/3 IT 2:  $n = 313$ , L2/3 IT 3:  $n = 133$ , L2/3 IT 4:  $n = 128$ ). The centerline of the boxplots defines the mean  
 382 over all relative  $R^2$  values, the height of the box is given by the interquartile range (IQR), the whiskers are given  
 383 by  $1.5 * IQR$  and outliers are given as points beyond the minimum or maximum whisker. (c) UMAPs of molecular  
 384 embedding of all L2/3 IT cells in an example image ( $n = 1204$  cells) showing if a given cell-type is present in the  
 385 neighborhood. The underlying neighborhoods were defined at the optimal resolution defined in Fig. 1d ( $100 \mu\text{m}$ ).  
 386 (d) Heatmap of fold change versus false-discovery rate corrected p-values of cluster enrichment of binary  
 387 neighborhood labels, where fold changes are the ratio between the relative neighboring source cell-type  
 388 frequencies per subtype cluster and the overall source cell-type frequency in the image. (e) Spatial allocation of  
 389 slice 153 of mouse brain in the MERFISH – brain dataset with L2/3 IT sub-states superimposed, L2/3 IT, L4/5 IT,  
 390 Sncg, and VLNC superimposed and superimposed the difference of  $R^2$  between the NCEM at resolution of  $100 \mu\text{m}$   
 391 and the best nonspatial baseline model.

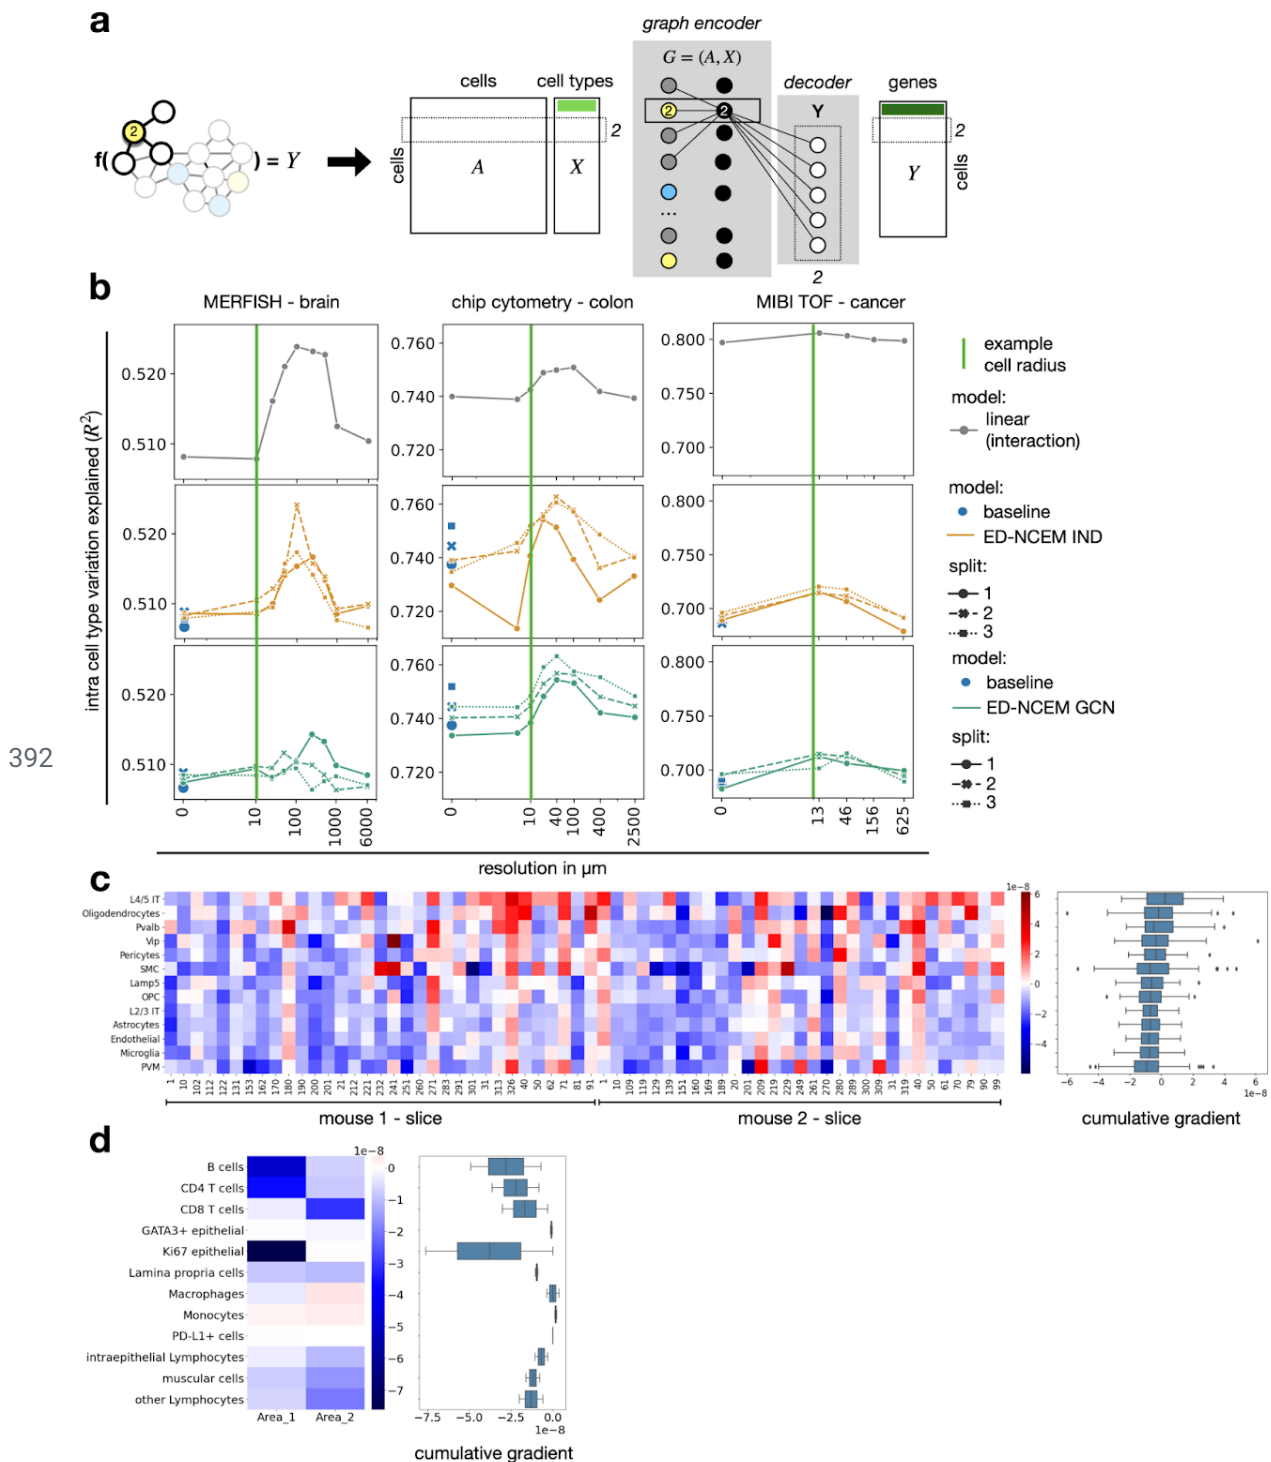

393 **Figure 3: Nonlinear models of spatial dependencies of expression states.** (a) A node-supervised model in  
 394 which the supervision label is the expression vector of a cell and the input consists of categorical cell-type  
 395 assignments and a spatial neighborhood graph. This model can also be viewed as an encoder–decoder model.  
 396 The encoder performs a graph-based embedding of a single cell and the decoder translates a bottleneck  
 397 activation vector into an expression state. (b) Nonlinear spatial dependencies in single-cell datasets. Shown are  
 398 the  $R^2$  values for held-out test data of encoder–decoder models by resolution in  $\mu\text{m}$  with cross validation  
 399 indicated as point shape and line style and comparatively mean performance of linear model in Fig. 1d. *Linear*  
 400 (*interaction*) (*gray line*): linear model with interaction effects; *ED*: encoder–decoder model; *IND*: the graph  
 401 convolution is an indicator function across cell-types in the neighborhood (yellow lines); *GCN*: the graph  
 402 convolution is a linear embedding (filter) of the cell-types in the neighborhood (teal lines); *split* (*point shapes*):  
 403 cross-validation split. (c) Heatmap of cumulative gradients (saliency) of gene expression prediction of L2/3 IT

404 with respect to the input cells, aggregated by the sender cell-type clusters, on test data. Shown is a cumulative  
 405 gradient matrix of L2/3 IT predictions by source cell-type and image. **(d)** Heatmap of cumulative gradients  
 406 (saliency) of gene expression prediction of CD8 T cells with respect to the input cells, aggregated by the sender  
 407 cell-type cluster, on the test data. Shown is a cumulative gradient matrix of CD8 T cell predictions by source  
 408 cell-type and image. The cumulative absolute gradients in **(c, d)** are derived from the absolute gradients tensor  
 409 across each cell's molecular vector prediction with respect to the cells in the neighborhood (source cells) per  
 410 image (tensor shape:  $genes \times cells \times images$ ), by taking a sum across the molecular output features and by  
 411 taking a sum across source cells of the same type (tensor shape:  $cell - types \times images$ ). For each box in **(c, d)**,  
 412 the centerline defines the mean over all image-wise saliencies, the width of the box is given by the interquartile  
 413 range (IQR), the whiskers are given by  $1.5 * IQR$  and outliers are given as points beyond the minimum or  
 414 maximum whisker.

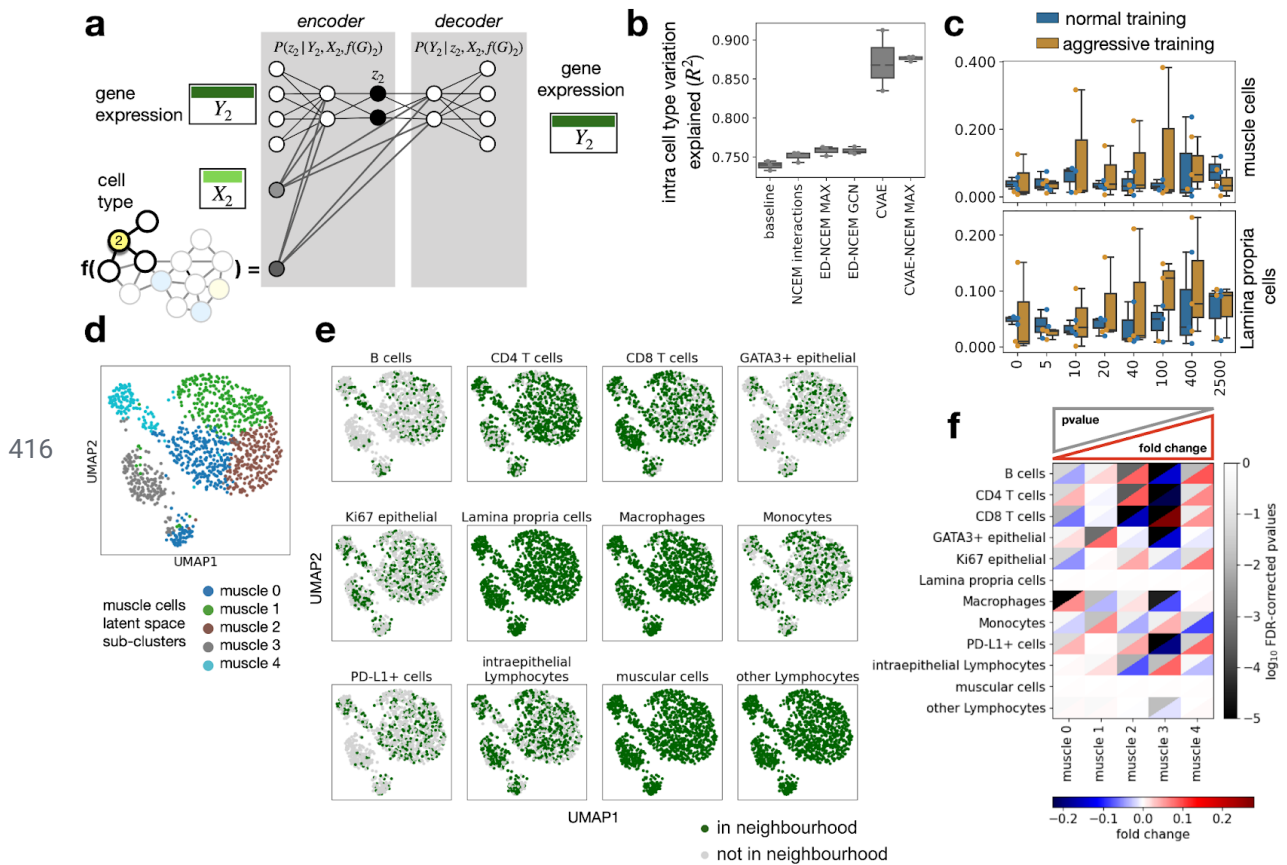

417 **Figure 4: Modelling intrinsic and extrinsic variation in deep latent variable models.** **(a)** A node generative  
 418 network (CVAE-NCEM) is a conditional variational autoencoder in which the condition is not a constant but a  
 419 graph embedding, which is also learned. **(b)** Latent variable models improve reconstructive performance. Shown  
 420 are the  $R^2$  values of held-out test data based on the forward pass model evaluation from chip cytometry – colon  
 421 data for linear models, encoder–decoder models, and variational autoencoders for both NCEM and nonspatial  
 422 models. *baseline*: a nonspatial linear model of gene expression per cell-type; *NCEM interactions*: linear model  
 423 with interaction effects; *ED*: encoder–decoder model; *IND*: the graph convolution is an indicator function across  
 424 cell-types in the neighborhood; *GCN*: the graph convolution is a linear embedding (filter) of the cell-types in the  
 425 neighborhood. **(c)** Neighborhood transfer performance of NCEM and nonspatial models. Shown is the  $R^2$  over  
 426 cells in the test set for models trained on predicting muscular cells and Lamina propria cells for both CVAE and  
 427 CVAE-NCEMs trained on neighborhoods with different radii with optimization algorithm as color. *Plain*: normal  
 428 CVAE training; *aggressive*: aggressive encoder training. For each box in **(b, c)**, the centerline defines the mean  
 429 over all three cross-validations, the height of the box is given by the interquartile range (IQR), the whiskers are  
 430 given by  $1.5 * IQR$  and outliers are given as points beyond the minimum or maximum whisker. **(d–f)** Latent  
 431 variables of CVAE-NCEM are confounded with neighborhood conditions. **(d)** UMAP of molecular embedding in  
 432 the CVAE-NCEM IND latent space of muscular cells in an example image ( $n = 1,149$  cells) with molecular  
 433 sub-clustering superimposed (muscle 0:  $n = 315$ , muscle 1:  $n = 287$ , muscle 2:  $n = 238$ , muscle 3:  $n = 183$ ,

434 muscle 4: n = 126). **(e)** UMAPs of molecular embedding in the CVAE–NCEM IND latent space of all muscle cells  
435 in the same image with superimposed binary label of presence of a given cell-type, as defined in the title, in the  
436 neighborhood. The underlying neighborhoods were defined at a resolution of 100  $\mu\text{m}$ . **(f)** Heatmap of fold change  
437 versus false-discovery corrected p-values of cluster enrichment of binary neighborhood labels where fold  
438 changes are the ratio between the relative neighboring source cell-type frequencies per subtype cluster and the  
439 overall source cell-type frequency in the image.

## 440 Online Methods

### 441 Data

#### 442 MERFISH – brain:

443 Zhang et al.<sup>12</sup> measured mouse primary motor cortex with multiplexed error-robust fluorescence in situ  
444 hybridization (MERFISH) in 634 images across two mice with 254 genes observed in 284,098 cells. The  
445 cell-types originally annotated by Zhang et al., that are also used here, are astrocytes, endothelial, L2/3  
446 intra-telencephalic (IT) neurons, L4/5 IT, L5/6 near-projecting (NP) neurons, L5 IT, L5 pyramidal tract (PT)  
447 neurons, L6 cortico-thalamic (CT) projection neurons, L6 IT, L6 IT Car3, L6b, Lamp5, microglia, oligodendrocyte  
448 precursor cells (OPC), oligodendrocytes, perivascular macrophages (PVM), pericytes, Parvalbumin (Pvalb),  
449 smooth muscle cells (SMC), Sncg, somatostatin (Sst), Sst Chodl, vascular leptomeningeal cells (VLMC),  
450 Vasoactive intestinal polypeptide (Vip), and other cells are annotated, where L identifies the layer (L1–L6) of the  
451 distinctive laminar structure based on cytoarchitectural features (Supp. Fig. 1a). Pvalb, Sst, Vip, Sncg and Lamp5  
452 define five subclasses of GABAergic cells. We removed cells labeled as “*other*” from the dataset. The gene-wise  
453 mean-variance relationship does not indicate count noise (Supp. Fig. 13a). As domain information, we used an  
454 identifier for the respective mouse. The dataset has a lateral resolution of 109 nm per pixel. Zhang et al. used a  
455 seeded watershed algorithm to identify cell segmentation boundaries in each image. They performed  
456 graph-based Louvain community detection<sup>19</sup> with the first 35 principal components using Scanpy<sup>17</sup> for  $k = 10$   
457 neighbors for cell-type clustering.

#### 458 chip cytometry – colon:

459 Jarosch et al. measured an inflamed colon with chip cytometry in two images across one patient with 19 genes  
460 observed in 11,321 cells. The cell-types originally annotated by Jarosch et al., which are modeled here, are B  
461 cells, CD4 T cells, CD8 T cells, GATA3+ epithelial, Ki67 high epithelial, Ki67 low epithelial, lamina propria cells,  
462 macrophages, monocytes, PD-L1+ cells, intraepithelial lymphocytes, muscular cells and other lymphocytes are  
463 annotated (Supp. Fig. 1a). We coarsened the cell-type annotation by combining Ki67 high epithelial and Ki67 low  
464 epithelial to a joined annotation of Ki67 epithelial. The gene-wise mean-variance relationship indicates count  
465 noise (Supp. Fig. 13b). Therefore, we log-transformed gene expression values. Jarosch et al. performed  
466 thresholding, watershed algorithm and additionally implemented a cell-type-specific segmentation method to  
467 segment individual cells. Intensity values were corrected for spatial spillover prior to quantification. Cell-types  
468 were clustered using the Leiden clustering<sup>18</sup> of the neighborhood-graph.

#### 469 MIBI TOF – cancer:

470 Hartmann et al.<sup>8</sup> measured colorectal carcinoma and healthy adjacent tissue with multiplexed ion beam imaging  
471 by time-of-flight (MIBI-TOF) in 58 images across four individuals with 36 genes observed in 63,747 cells. The  
472 cell-types originally annotated by Hartmann et al., which are modeled here, are endothelial, epithelial, fibroblast,  
473 CD11c myeloid, CD68 myeloid, CD4 T cells, CD8 T cells and other immune cells are annotated (Supp. Fig. 1a).  
474 A coarser cell-type labeling was not applied to this dataset. The cohort in this dataset includes two patients with  
475 colorectal carcinoma and two healthy controls. The images have a size of  $400 \mu\text{m}^2$  and  $1,024 \times 1,024$  pixels. The  
476 gene-wise mean-variance relationship does not indicate count noise (Supp. Fig. 13b). We scaled the model  
477 outputs by cell-wise size factors. Hartmann et al. trained a convolutional neural network. They fed the output into  
478 the watershed algorithm to segment individual cells and cell-types were clustered using the FlowSOM R package  
479 and manually annotated based on their lineage marker profiles.

#### 480 MELC – tonsils:

481 Pascual-Reguant et al.<sup>7</sup> measured tonsils from patients undergoing tonsillectomy with multi-epitope ligand  
482 cartography (MELC), an immunohistochemistry approach, in one image across one patient, with 51 genes  
483 observed in 9,512 cells. The cell-types originally annotated by Pascual-Reguan et al., which are modeled here,  
484 are B cells, endothelial cells, ILC, monocytes/macrophages/DC, NK cells, plasma cells, T cytotoxic cells, T helper  
485 cells and other cells are annotated (Supp. Fig. 1a). We removed cells labeled as “*other*” from the dataset. The  
486 gene-wise mean-variance relationship does not indicate count noise (Supp. Fig. 13d). Pascual-Reguant et al.  
487 performed segmentation by applying a signal-classification step using Ilastik 1.3.2 and an object-recognition step  
488 using CellProfiler 3.1.8, which were analyzed and clustered in Orange 3.26.0.

489 CODEX – cancer:

490 Schürch et al.<sup>13</sup> measured advanced-stage colorectal cancer with co-detection by indexing (CODEX) in 140  
 491 images across 35 patients with 57 genes observed in 272,266 cells. The cell-types originally annotated by Zhang  
 492 et al., which are modeled here, are B cells, CD11b+ monocytes, CD11c+ dendritic cells, CD11b+CD68+  
 493 macrophages, CD163+ macrophages, CD68+ macrophages, CD68+ macrophages GzmB+, CD68+CD163+  
 494 macrophages, CD3+ T cells, CD4+ T cells, CD4+ T cells CD45RO+, CD4+ T cells GATA3+, CD8+ T cells, NK  
 495 cells, T regs, adipocytes, dirt, granulocytes, immune cells, immune cells / vasculature, lymphatics, nerves,  
 496 plasma cells, smooth muscle, stroma, tumor cells, tumor cells / immune cells and vasculature are annotated  
 497 (Supp. Fig. 1a). Cells with an annotation of dirt or an undefined label were removed from the dataset. A coarser  
 498 cell-type grouping was applied to the macrophage groups CD11b+CD68+ macrophages, CD163+ macrophages,  
 499 CD68+ macrophages, CD68+ macrophages GzmB+ and CD68+CD163+ macrophages. Additionally, CD4+ T  
 500 cells, CD4+ T cells CD45RO+ and CD4+ T cells GATA3+ were grouped into CD4+ T cells. The gene-wise  
 501 mean-variance relationship indicates count noise (Supp. Fig. 13e). Therefore, we scaled model outputs by the  
 502 node size in the respective output layer of each model class. Schürch et al. performed segmentation using the  
 503 CODEX toolkit segmenter and unsupervised cell-type clustering using X-shift.  
 504

| dataset / first author | technology     | domain  | transform   | node size scaling | batch size | n   |
|------------------------|----------------|---------|-------------|-------------------|------------|-----|
| Zhang                  | MERFISH        | patient | -           | False             | 64         | 10  |
| Jarosch                | Chip Cytometry | patient | $\log(x+1)$ | False             | 2          | 100 |
| Hartmann               | MIBI-TOF       | image   | -           | True              | 58         | 10  |
| Pascual-Reguant        | MELC           | patient | -           | True              | 1          | 200 |
| Schürch                | CODEX          | patient | $\log(x+1)$ | True              | 140        | 10  |

505

506 **Table 1: Overview of datasets analyzed in this study.** Shown are the spatial molecular profiling chemistry, the  
 507 domain effect accounted for via batch covariates, the data transform used on the expression vectors, the  
 508 inclusion of cell size factors, the number of images given to the models during each update (batch size) and the  
 509 number of nodes evaluated per image per batch (n).

## 510 Models

511 The inputs to NCEMs are a gene expression matrix  $Y \in \mathbb{R}^{N \times J}$ , where  $N$  is the number of cells and  $J$  is the  
 512 number of genes with  $y_i$  being the gene expression vector for gene  $i = 1, \dots, J$ , a matrix of observed cell-types  
 513  $X_l \in \mathbb{R}^{N \times L}$  where  $L$  is the number of distinct cell-type labels and  $X_c \in \mathbb{R}^{N \times C}$  is a matrix specifying the batch  
 514 assignments, with  $C$  being the number of distinct batches or domains, such as images or patients, in the  
 515 dataset. We denote the adjacency matrix of connected cells as  $A \in \mathbb{R}^{N \times N}$  which is calculated based on the spatial  
 516 proximity of cells per image. For linear models and models with an indicator aggregator, a binary adjacency  
 517 matrix is used with  $a_{ij} = 1$  if  $d(x_i, x_j) \leq \delta_{max}$  where  $d(\cdot, \cdot)$  describes the euclidean distance between nodes  $i, j \in N$   
 518 and  $\delta_{max}$  is the maximal distance between interacting nodes (neighborhood size), and  $a_{ij} = 0$  otherwise. For  
 519 models using a GCN as graph layer, we normalize  $A$  such that all rows sum to one, so  $D^{-1}A$  where  $D$  is the  
 520 diagonal node degree matrix. The output of NCEMs is  $\hat{Y} \in \mathbb{R}^{N \times J}$ , a reconstruction of the input count matrix  $Y$ ,  
 521 with  $\hat{y}_i$  being the reconstructed expression for gene  $i = 1, \dots, J$ . For MIBI-TOF - cancer, MELC - tonsils and  
 522 CODEX - cancer, we applied size factor scaling to the network output  $\hat{Y}$ . Let  $\bar{\mu} = \frac{1}{N} \sum_i \sum_j y_{ij}$  be the global mean per  
 523 node, then size factors are given by  $sf_k = \bar{\mu} / \sum_j y_{j,k} \in \mathbb{R}^N$ . The network output scaling is then given by  $\hat{Y} = \hat{Y} \cdot sf$ .

524

525 **Loss functions:** According to the noise structure of the datasets explored in this paper (Supp. Fig. 13) we use a  
 526 Gaussian log-likelihood loss as an optimization objective for GLM and ED models with  
 527  $ll_N = \frac{1}{N} \sum_{i=1}^N (\log(\sqrt{2\pi} \cdot \sigma_i) + \frac{(\hat{y}_i - y_i)^2}{\sigma_i^2})$ , where  $\sigma_i$  is the predicted standard deviation for a gene  $i = 1, \dots, N$ . The loss  
 528 function of CVAE models is the negative log-likelihood regularized by the Kullback-Leibler divergence between

529 the encoder distribution  $q_{\varphi}(z|Y)$  and the distribution of the latent space  $p(z)$ , so  
530  $l_{CVAE} = -l_N + KL[q_{\varphi}(z|Y) || p(z)]$ . For chip cytometry – colon and CODEX – cancer we therefore  $\log(Y + 1)$   
531 transformed the gene expression data.

532

533 *Optimization*: For each dataset, we ran grid searches to find the optimal set of hyperparameters. As batch size  
534 we choose the number of images per dataset. The number of nodes evaluated per image per batch was selected  
535 to ensure convergence and stabilize training. All models were trained with the Adam optimizer algorithm  
536 implemented in tensorflow. Linear models were trained with a  $lr = 0.5$ , the remaining models were trained for a  
537 varying learning rate of  $lr = \{0.5, 0.05, 0.005\}$ . Additionally, we used a learning scheduler on the validation loss  
538 with a patience of 20 epochs which reduces the learning rate by a factor of 0.5, so  $lr_{new} = lr * 0.5$  and early  
539 stopping with a patience of 100 epochs. The exact description of all grid searches in code are supplied in the  
540 benchmarking repository (Code Availability).

541

542 *Linear NCEM*: The NCEM includes two linear regression models. The nonspatial baseline linear model infers a  
543 reconstruction  $\hat{Y}$  from a nodes cell-type and respective domain information via  $\hat{Y} = X_D\beta$ , where  $X_D$  is the design  
544 matrix and  $\beta \in R^{(L+C)\times N}$  are the parameters learned by the model. The design matrix for nonspatial baseline  
545 models is given by  $X_D = (X_l, X_c) \in R^{N\times(L+C)}$ . The spatial counterpart model, the NCEM, has access to an  
546 interaction matrix. First, we compute discrete target cell interactions with  $X_T = 1_{(A \cdot X_l > 0)} \in [0, 1]^{N\times L}$ , where  $1_{(\cdot)}$   
547 represents an indicator function. To generate a matrix representation of target-source cell interactions, we  
548 compute the interaction between each column of  $X_l$  and each column  $X_T$  via the point-wise product. The  
549 resulting interaction matrix is then denoted as  $X_{TS} \in \{0, 1\}^{N\times L^2}$  and the design matrix for the linear model with  
550 interaction terms is given by  $X_D = (X_l, X_{TS}, X_c) \in R^{N\times(L+L^2+C)}$ . Equivalently, the model infers  $\hat{Y} = X_D\beta$  where  
551  $\beta \in R^{(L+L^2+C)\times N}$  and additionally the gene variance per node which is inferred in the last layer of the linear model.  
552 We also considered an NCEM without interaction terms which does not have receiver-specific sender effects, but  
553 only global sender effects which account for the presence of senders in the niche via  $X_S \in \{0, 1\}^{N\times L}$ :  
554  $X_D = (X_l, X_S, X_c) \in R^{N\times(L+L+C)}$ . Coefficient significance is computed with Wald hypothesis testing with a  
555 significance threshold of  $\tau = 0.01$  on the parameters learned by the model for the interaction matrix  $X_{TS}$ .

556

557 *Nonlinear encoder–decoder NCEM (ED-NCEM)*: The NCEM includes nonlinear encoder–decoder models that  
558 encode the neighborhood through a graph neural network (ED-NCEM) and decode expression vectors. The  
559 nonspatial null model is a nonlinear model (ED) that predicts expression from cell-type and graph-level  
560 predictors, alone. An encoder is given by  $f_{enc} : q_{\varphi}(z | X_l, g(A, X_l), X_c)$ , which encodes the cell-type labels  $X_l$ ,  
561 some graph-level predictors  $X_c$  and the local graph embedding  $g(A, X_l)$ , based on the adjacency matrix  $A$ , into a  
562 latent state  $z$ . The latent state is input to the decoder and given by  $f_{dec} : p_{\theta}(\hat{Y} | z, X_l, g(A, X_l), X_c)$ . If  $g(A, X_l)$  is  
563 an indicator embedding function as described in the section “Linear NCEM”, then  $g(A, X_l) = X_{TS}$  and the input to  
564 the linear model and the encoder are the same. If then also all hidden layers are removed from the ED-NCEM, a  
565 single linear transformation of the input remains which is equivalent to the linear NCEM. Alternatively,  $g(A, X_l)$   
566 can be a graph embedding learned by a graph-convolutional network (GCN)<sup>10,11</sup>. A one-layer GCN is given by  
567  $g(A, X_l) = \text{softmax}(\text{ReLU}(AX_lW))$  where  $W \in R^{L\times H}$  is an input-to-graph-embedding weight matrix with  $H$  being  
568 the dimension of the learned graph representation and  $\bar{A}$  being the normalized adjacency matrix. In this case,  $W$   
569 can be learned using gradient descent.

570

571 *Conditional variational autoencoder NCEM (CVAE–NCEM)*: A variational autoencoder<sup>29</sup> learns a distribution over  
572 node states  $Y$  through a variational posterior over a latent space representation  $z$  which yields a reconstruction  
573  $\hat{Y}$  of  $Y$  via a likelihood function (the decoder). The nonspatial CVAE null model contains the cell-type and  
574 graph-level predictors as a condition in the variational posterior and the likelihood. In CVAE–NCEM, the  
575 conditions are the cell-type labels  $X_l$ , some graph-level predictors  $X_c$  and the local graph embedding  $g(A, X_l)$ ,

576 based on the adjacency matrix  $A$ . The encoder is then given by  $f_{enc}^{NG-CVAE} : q_{\psi}(z | Y, X_l, g(A, X_l), X_c)$  and the  
577 decoder is defined by  $f_{dec}^{NG-CVAE} : p_{\theta}(\hat{Y} | z, X_l, g(A, X_l), X_c)$ . A CVAE–NCEM for a full dataset depends on both  
578 the spatial context and the type of the cell itself. This setting presents the challenge of encountering a  
579 non-identifiability between variance attributed to latent variables, cell-type conditions, and neighborhood context.  
580 In this study, we consider the CVAE–NCEM trained on the molecular vectors of a single target cell-type as a  
581 function of the full neighborhood context to remove the non-identifiability with respect to cell-type variation and  
582 focus on the non-identifiability between latent variables and neighborhoods.

### 583 Normalized saliency maps

584 Saliency maps are used to differentiate the importance of features in the network input to analyze their  
585 importance for the network output for nonlinear models. In our case, saliency maps are aggregated at the  
586 cell-type level to extract communication events learned by the model, so  $SALS \in R^{L \times L}$  with  $L$  being the number  
587 of distinct cell-types in the model. Non-normalized saliencies will show a pattern similar to the contact frequency  
588 matrix  $M \in R^{L \times L}$  as cell-types with frequent connections will skew the learned importance of cell connections.  
589 We therefore normalize the saliencies by the absolute frequency of cell–cell connections, that is  
590  $SALS_{norm} = \frac{1}{x_{ij}} * SALS_{ij} \in R^{L \times L}$  for  $x_{ij} \in M$  with  $i, j = 1, \dots, L$ .

### 591 Model evaluation

592 Overall model performance evaluation is based on the coefficient of determination  $R^2 = 1 - \frac{\sum_{i=1}^N (y_i - \hat{y}_i)^2}{\sum_{i=1}^N (y_i - \bar{y})^2} \in [0, 1]$  with  
593  $\bar{y}$  being the mean over gene expression values. Best performing models are selected based on highest  $R^2$  for  
594 the validation dataset. These metrics are based on model predictions, which derive from a forward pass through  
595 the model. The performance of CVAEs is additionally assessed in style transfer tasks. In style transfer, the gene  
596 expression state and neighborhood of a reference node from the source domain is encoded to estimate the latent  
597 states of this node. This latent representation is then decoded to the target domain, which implies conditioning  
598 the decoding on the target neighborhood:

$$599 z^i \sim q_{\psi}(z | Y^i, X_l^i, g(A, X_l), X_c^i) \quad (1)$$

$$600 \hat{Y}^j = p_{\theta}(z^i, X_l^j, g(A, X_l), X_c^j) \quad (2)$$

601 where  $i, j$  are cell indices,  $q_{\psi}$  is the variational posterior and  $p_{\theta}$  is the decoder network. See also “*Conditional*  
602 *variational autoencoder NCEM (CVAE–NCEM)*” for details on the notation.

### 603 Ligand–receptor association analysis

604 For ligand–receptor permutation tests we used the CellphoneDB<sup>3</sup> implementation in Squidpy<sup>15</sup>. For the chip  
605 cytometry – colon, MIBI TOF – cancer<sup>8</sup>, MELC – tonsils<sup>7</sup>, and CODEX – cancer<sup>13</sup> datasets, node feature names  
606 are mapped to HGNC gene names. After the mapping, we used the ligand–receptor interaction pairs of the  
607 Omnipath database<sup>30</sup> in Squidpy<sup>21</sup> and ran the permutation test for  $n = 1,000$  permutations. For three datasets,  
608 we used a random subsample of all cells (MERFISH – brain<sup>12</sup> 10% with  $n = 27,655$ , MIBI TOF – cancer<sup>8</sup> 40%  
609 with  $n = 25,498$  and CODEX – cancer<sup>13</sup> 10% with  $n = 25,186$ ). Results are visualized with Squidpy<sup>21</sup> with only  
610 p-values below a threshold of 0.3 shown.

### 611 Variance attribution analysis

612 We used Uniform Manifold Approximation and Projection<sup>31</sup> (UMAP) to embed the cells in two dimensions for  
613 visualization of high-dimensional data. For the UMAPs of the MERFISH – brain data<sup>12</sup> matrix (Fig. 1c and Supp.  
614 Fig. 5b) we performed dimensionality reduction using PCA with the first 35 principal components (PCs) and the  
615 nearest neighborhood size of  $k = 10$ . A similar approach was described by Zhang et al. to identify stable clusters  
616 for subsequent cell-type annotation. For the UMAPs of L2/3 IT neurons in slice 153 (Fig. 2) and slice 162 (Supp.  
617 Fig 5b) of the MERFISH - brain dataset, we used the first 40 PCs with  $k = 40$  and performed graph-based  
618 Louvain community detection<sup>19</sup> using Scanpy<sup>17</sup> to define stable L2/3 IT substates. For the UMAPs of CD8 T cells  
619 in area 1 in the chip cytometry dataset (Supp. Fig. 8), we used the input matrix directly and  $k = 22$ . For the



620 UMAPs of CD8 T cells in image 1, 5, 8 and 16 of the MIBI-TOF - cancer dataset (Supp. Fig. 9), we used the input  
 621 matrix directly and  $k=60$ . Clustering of the latent space in CVAE and CVAE-NCM IND models (Fig. 4d, Supp.  
 622 Fig. 11c) was performed using the latent space matrix directly and  $k = 80$  for the MERFISH - brain dataset and  $k$   
 623 = 250 for the chip cytometry - colon dataset.

624

625 For cluster enrichment analysis, we performed Fisher's exact test. Each contingency table is composed of two  
 626 categorical variables. The first variable is the number of cells in one specific L2/3 IT substate versus the  
 627 remaining L2/3 IT substates. The second variable is the number of cells with a respective source type in their  
 628 neighborhood and those cells where this source type is not present in the neighborhood. We performed  
 629 Benjamini and Hochberg false discovery rate correction (FDR) of cluster enrichment p-values. A similar approach  
 630 was used for the cluster enrichment analysis of CD8 T cells in the chip cytometry - colon and the MIBI-TOF -  
 631 cancer datasets.

632

633 For comparison of the source cell-type rankings of contact frequencies, ligand-receptor analysis and cluster  
 634 enrichment analysis of L2/3 IT cells, we performed Kendall's tau correlation analysis and computed the tau  
 635 statistic and the two-sided p-value. Contact frequencies are ranked by source type frequencies (row L2/3 IT of  
 636 Supp. Fig. 6). For ligand-receptor analyses, source cell-types are ranked based on the number of significant  
 637 p-values below a threshold of 0.05 for this L2/3 IT interaction. For the cluster enrichment analysis we used the  
 638 ranking shown in Fig. 2d.

639 Variance decomposition into inter- and intra-cell-type variance

640 The variance of a single-cell resolved dataset can be decomposed into inter-cell-type variance, intra-cell-type  
 641 variance, and gene variance. The gene variance is independent of cell-type definitions and can therefore be  
 642 considered separately from relative intra- and inter-cell-type variance.

$$\begin{aligned}
 \text{var}(x) &= \sum_i (x_i - \bar{x})^2 = \sum_i (x_i - \bar{x}_{k(i)}^g + \bar{x}_{k(i)}^g - \bar{x}^g)^2 \\
 &= \sum_i (x_i - \bar{x}_{k(i)}^g)^2 + \sum_i (\bar{x}_{k(i)}^g - \bar{x}^g)^2 - \sum_k 2 * (\bar{x}_k^g - \bar{x}^g) \sum_{i \forall k(i)=k} (x_i - \bar{x}_k^g) \\
 643 &= \sum_i (x_i - \bar{x}_{k(i)}^g)^2 + \sum_i (\bar{x}_{k(i)}^g + \bar{x}^g - \bar{x}^g - \bar{x})^2 \\
 &= \underbrace{\sum_i (x_i - \bar{x}_{k(i)}^g)^2}_{\text{intra cell type variance}} + \underbrace{\sum_i (\bar{x}_{k(i)}^g - \bar{x}^g)^2}_{\text{inter cell type variance}} + \underbrace{\sum_i (\bar{x}^g - \bar{x})^2}_{\text{gene variance}}
 \end{aligned}$$

644 where  $x_i$  is the expression vector of cell  $i$ ,  $\bar{x}^g$  is the vector of gene-wise means of the dataset,  $\bar{x}_k^g$  is the vector of  
 645 gene-wise means of the cells in cell-type  $k$ ,  $k(i)$  is the cell-type of cell  $i$ , and  $\bar{x}$  is the scalar gene- and cell-wise  
 646 mean of the dataset.

## 647 Data Availability

648 The MERFISH - brain<sup>12</sup>, MIBI TOF - cancer<sup>8</sup>, MELC - tonsils<sup>7</sup> and CODEX - cancer<sup>13</sup> datasets are publicly  
 649 available (Online Methods). The chip cytometry - colon dataset has been generated by the Busch lab and is  
 650 currently under review, and has kindly been provided to us.

## 651 Code Availability

652 All models described here are implemented in a Python package available at <https://github.com/theislab/ncem>.  
 653 All benchmarking and analysis codes are provided at [https://github.com/theislab/ncem\\_benchmarks](https://github.com/theislab/ncem_benchmarks). Tutorials for  
 654 model usage are available from [https://github.com/theislab/ncem\\_tutorials](https://github.com/theislab/ncem_tutorials).

## 655 Author Contributions

656 DSF and FJT conceived the project. DSF and ACS performed the analysis and wrote the code. DSF, ACS and  
 657 FJT wrote the manuscript.

## 658 Acknowledgements

659 We would like to thank Sabrina Richter, Mohammad Lotfollahi, Prof. Dr. Stephan Günemann, Dr. Christian M.  
660 Schürch, Sebastian Jarosch and Prof. Dr. Dirk Busch for valuable discussion and feedback on this project. In  
661 particular, we want to thank Sebastian Jarosch and Prof. Dr. Dirk Busch for sharing the chip cytometry – colon  
662 dataset pre-publication. We would like to thank Dr. Luke Zappia and Giovanni Palla for their valuable feedback on  
663 this manuscript.

664

665 This work was supported by the German Federal Ministry of Education and Research (BMBF) under Grant No.  
666 01IS18036B and No. 01IS18053A, by the Bavarian Ministry of Science and the Arts in the framework of the  
667 Bavarian Research Association “ForInter” (Interaction of human brain cells), by the Wellcome Trust Grant  
668 108413/A/15/D and by the Helmholtz Association’s Initiative and Networking Fund through Helmholtz AI [grant  
669 number: ZT-I-PF-5-01]. D.S.F. acknowledges support from a German Research Foundation (DFG) fellowship  
670 through the Graduate School of Quantitative Biosciences Munich (QBM) [GSC 1006 to D.S.F.] and by the  
671 Joachim Herz Foundation. ACS has been funded by the German Federal Ministry of Education and Research  
672 (BMBF) under Grant No. 01IS18036B.

## 673 Conflict of interest

674 F.J.T. reports receiving consulting fees from Cellarity Inc., and ownership interest in Cellarity, Inc. and  
675 Dermagnostix.

## 676 References

- 677 1. Raposo, G. & Stoorvogel, W. Extracellular vesicles: exosomes, microvesicles, and friends. *J. Cell Biol.* **200**,  
678 373–383 (2013).
- 679 2. Browaeys, R., Saelens, W. & Saeys, Y. NicheNet: modeling intercellular communication by linking ligands to  
680 target genes. *Nat. Methods* **17**, 159–162 (2020).
- 681 3. Efremova, M., Vento-Tormo, M., Teichmann, S. A. & Vento-Tormo, R. CellPhoneDB: inferring cell–cell  
682 communication from combined expression of multi-subunit ligand–receptor complexes. *Nat. Protoc.* **15**,  
683 1484–1506 (2020).
- 684 4. Almet, A. A., Cang, Z., Jin, S. & Nie, Q. The landscape of cell–cell communication through single-cell  
685 transcriptomics. *Current Opinion in Systems Biology* vol. 26 12–23 (2021).
- 686 5. Arnol, D., Schapiro, D., Bodenmiller, B., Saez-Rodriguez, J. & Stegle, O. Modeling Cell-Cell Interactions from  
687 Spatial Molecular Data with Spatial Variance Component Analysis. *Cell Rep.* **29**, 202–211.e6 (2019).
- 688 6. Goltsev, Y. *et al.* Deep Profiling of Mouse Splenic Architecture with CODEX Multiplexed Imaging. *Cell* **174**,  
689 968–981.e15 (2018).
- 690 7. Pascual-Reguant, A. *et al.* Multiplexed histology analyses for the phenotypic and spatial characterization of  
691 human innate lymphoid cells. *Nat. Commun.* **12**, 1737 (2021).
- 692 8. Hartmann, F. J. *et al.* Single-cell metabolic profiling of human cytotoxic T cells. *Nat. Biotechnol.* **39**, 186–197  
693 (2021).
- 694 9. Xia, C., Fan, J., Emanuel, G., Hao, J. & Zhuang, X. Spatial transcriptome profiling by MERFISH reveals  
695 subcellular RNA compartmentalization and cell cycle-dependent gene expression. *Proc. Natl. Acad. Sci. U.*  
696 *S. A.* **116**, 19490–19499 (2019).

- 697 10. Kipf, T. N. & Welling, M. Semi-Supervised Classification with Graph Convolutional Networks. *arXiv [cs.LG]*  
698 (2016).
- 699 11. Scarselli, F., Gori, M., Tsoi, A. C., Hagenbuchner, M. & Monfardini, G. The graph neural network model. *IEEE*  
700 *Trans. Neural Netw.* **20**, 61–80 (2009).
- 701 12. Zhang, M. *et al.* Molecular, spatial and projection diversity of neurons in primary motor cortex revealed by in  
702 situ single-cell transcriptomics. doi:10.1101/2020.06.04.105700.
- 703 13. Schürch, C. M. *et al.* Coordinated Cellular Neighborhoods Orchestrate Antitumoral Immunity at the  
704 Colorectal Cancer Invasive Front. *Cell* **183**, 838 (2020).
- 705 14. Kleshchevnikov, V. *et al.* Comprehensive mapping of tissue cell architecture via integrated single cell and  
706 spatial transcriptomics. doi:10.1101/2020.11.15.378125.
- 707 15. Palla, G., Spitzer, H., Klein, M., Fischer, D. & Schaar, A. C. Squidpy: a scalable framework for spatial single  
708 cell analysis. *bioRxiv* (2021).
- 709 16. Hetzel, L., Fischer, D. S., Günemann, S. & Theis, F. J. Graph Representation Learning for Single Cell  
710 Biology. *Current Opinion in Systems Biology* (2021) doi:10.1016/j.coisb.2021.05.008.
- 711 17. Wolf, F. A., Angerer, P. & Theis, F. J. SCANPY: large-scale single-cell gene expression data analysis.  
712 *Genome Biol.* **19**, 15 (2018).
- 713 18. Traag, V. A., Waltman, L. & van Eck, N. J. From Louvain to Leiden: guaranteeing well-connected  
714 communities. *Sci. Rep.* **9**, 5233 (2019).
- 715 19. Blondel, V. D., Guillaume, J.-L., Lambiotte, R. & Lefebvre, E. Fast unfolding of communities in large  
716 networks. *J. Stat. Mech.* **2008**, P10008 (2008).
- 717 20. Ishida, Y., Agata, Y., Shibahara, K. & Honjo, T. Induced expression of PD-1, a novel member of the  
718 immunoglobulin gene superfamily, upon programmed cell death. *The EMBO Journal* vol. 11 3887–3895  
719 (1992).
- 720 21. Lopez, R., Regier, J., Cole, M. B., Jordan, M. I. & Yosef, N. Deep generative modeling for single-cell  
721 transcriptomics. *Nat. Methods* **15**, 1053–1058 (2018).
- 722 22. Eraslan, G., Simon, L. M., Mircea, M., Mueller, N. S. & Theis, F. J. Single-cell RNA-seq denoising using a  
723 deep count autoencoder. *Nat. Commun.* **10**, 390 (2019).
- 724 23. Lotfollahi, M., Wolf, F. A. & Theis, F. J. scGen predicts single-cell perturbation responses. *Nat. Methods* **16**,  
725 715–721 (2019).
- 726 24. Alemi, A. A. *et al.* Fixing a Broken ELBO. *arXiv [cs.LG]* (2017).
- 727 25. He, J., Spokoyny, D., Neubig, G. & Berg-Kirkpatrick, T. Lagging Inference Networks and Posterior Collapse  
728 in Variational Autoencoders. *arXiv [cs.LG]* (2019).
- 729 26. Giesen, C. *et al.* Highly multiplexed imaging of tumor tissues with subcellular resolution by mass cytometry.  
730 *Nat. Methods* **11**, 417–422 (2014).

- 731 27. Eng, C.-H. L. *et al.* Transcriptome-scale super-resolved imaging in tissues by RNA seqFISH. *Nature* vol. 568  
732 235–239 (2019).
- 733 28. Veličković, P. *et al.* Graph Attention Networks. *arXiv [stat.ML]* (2017).
- 734 29. Kingma, D. P. & Welling, M. Auto-Encoding Variational Bayes. *arXiv [stat.ML]* (2013).
- 735 30. Türei, D. *et al.* Integrated intra- and intercellular signaling knowledge for multicellular omics analysis.  
736 doi:10.1101/2020.08.03.221242.
- 737 31. McInnes, L., Healy, J. & Melville, J. UMAP: Uniform Manifold Approximation and Projection for Dimension  
738 Reduction. *arXiv [stat.ML]* (2018).
- 739
